# Supplementary material
Source: MDPI journal article supplement (https://www.mdpi.com/2673-8783/2/3/10)
Supplement: s1 [file s1]

## **Supplementary Information**

### **Biomass-derived Advanced Carbon-based Electrocatalysts for Oxygen Reduction Reaction**

Srijib Das<sup>a</sup>, Souvik Ghosh<sup>a,b</sup>, Tapas Kuila<sup>a,b</sup>, Naresh Chandra Murmu<sup>a,b</sup>, and Aniruddha Kundu<sup>a\*</sup>

<sup>a</sup> Surface Engineering & Tribology Division, Council of Scientific and Industrial Research Central Mechanical Engineering Research Institute, Mahatma Gandhi Avenue, Durgapur-713209, West Bengal, India

<sup>b</sup> Academy of Scientific and Innovative Research (AcSIR), CSIR-Human Resource Development Centre, (CSIR-HRDC) Campus, Postal Staff College Area, Sector 19, Kamla Nehru Nagar, Ghaziabad-201002, Uttar Pradesh, India

\* Correspondence: Dr. Aniruddha Kundu (write2aknow@gmail.com)

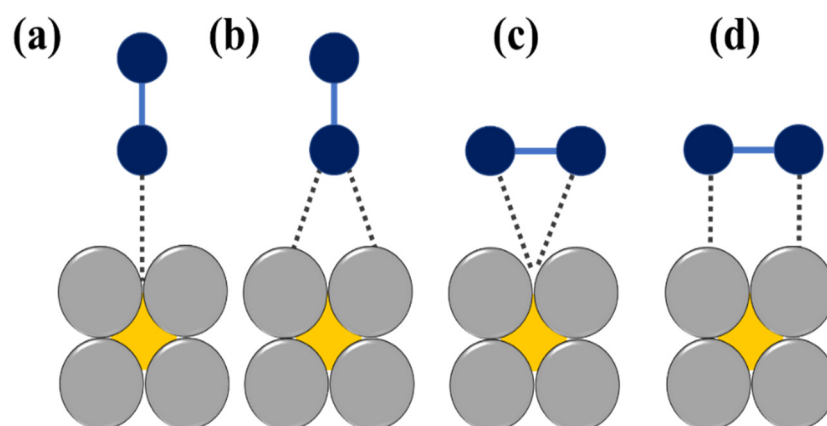

**Figure S1.** The schematic illustration of various modes of  $O_2$  adsorption on catalyst surfaces: a, on top end-on; b, bridge end-on; c, bridge side-on one site; and d, bridge side-on two sites, adapted from [1].

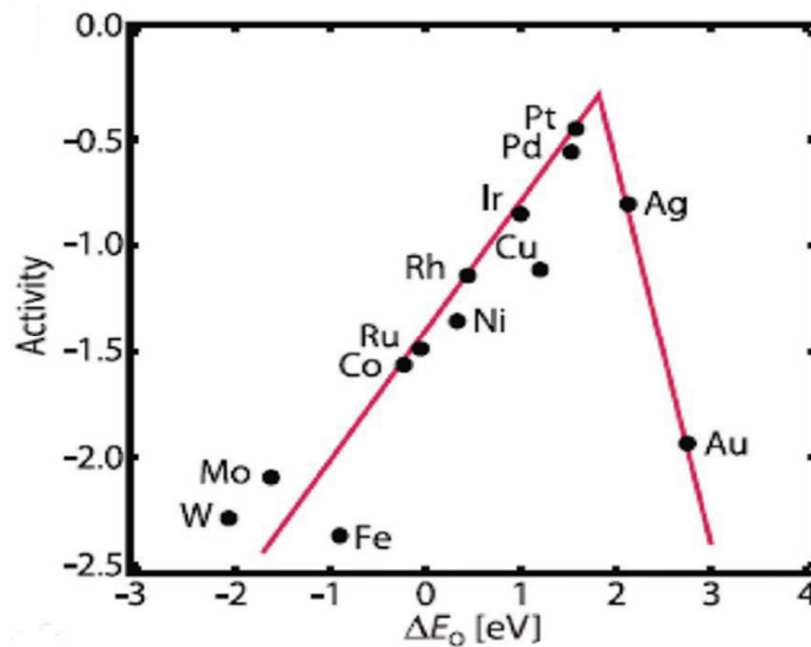

**Figure S2.** Trends in oxygen reduction activity plotted as a function of the oxygen-binding energy, adapted from [2].

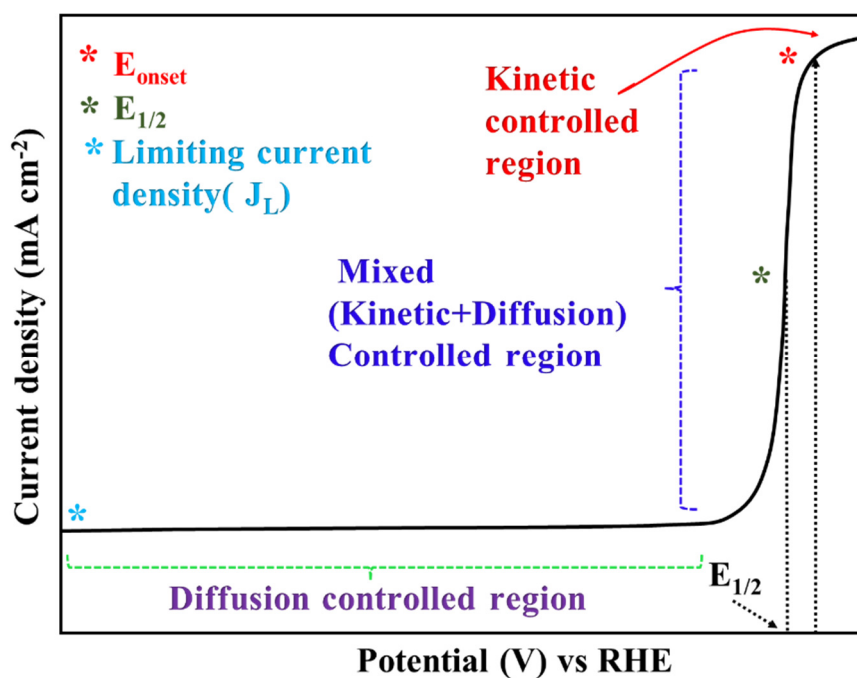

**Figure S3.** Typical LSV polarization curve for ORR with different regions.

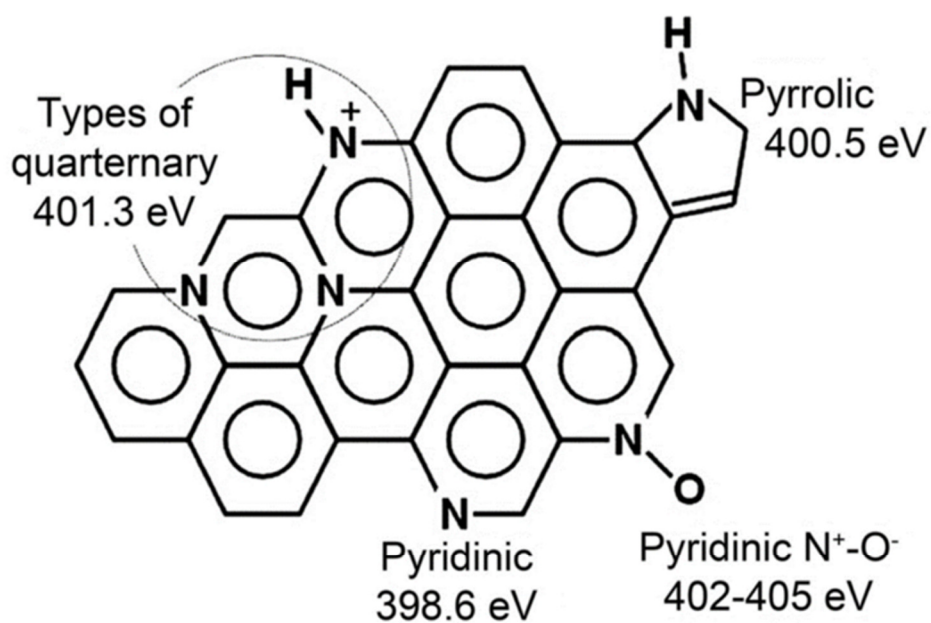

**Figure S4.** Different forms of doped nitrogen in nitrogen-functionalized carbon, adapted from [3].

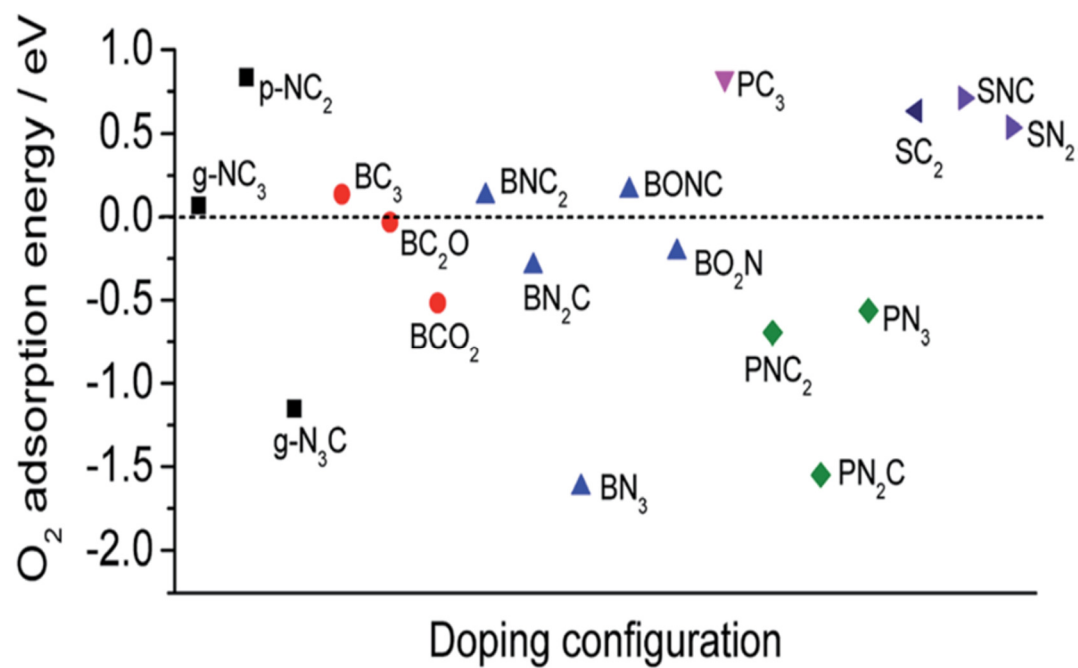

**Figure S5.**  $O_2$  adsorption energy of all the doping configurations, adapted from [4].

## References

1. Worku, A. K.; Ayele, D. W.; Habtu, N. G. Recent advances and future perspectives in engineering of bifunctional electrocatalysts for rechargeable zinc–air batteries. *Mater. Today Adv.* 2021, 9, 100116.
2. Seh, Z. W.; Kibsgaard, J.; Dickens, C. F.; Chorkendorff, I. B.; Nørskov, J. K.; Jaramillo, T. F. Combining theory and experiment in electrocatalysis: insights into materials design. *Science* 2017, 355, eaad4998
3. Yang, L.; Shui, J.; Du, L.; Shao, Y.; Liu, J.; Dai, L.; Hu, Z. Carbon-based metal-free ORR electrocatalysts for fuel cells: past, present, and future. *Adv. Mater.* 2019, 31, 1804799.
4. Jiang, Y.; Yang, L.; Wang, X.; Wu, Q.; Ma, J.; Hu, Z. Doping  $\text{sp}^2$  carbon to boost the activity for oxygen reduction in an acidic medium: a theoretical exploration. *RSC Adv.* 2016, 6, 48498–48503.
